# Supplementary material for: Colonoscopy-related injury among colonoscopists: an international survey
Source: PubMed Central journal article supplement — Endosc Int Open. 2021 Jan 1;9(1):E102–9. doi: 10.1055/a-1311-0561 (PMC7775804; doi:10.1055/a-1311-0561), 2021-01-01
Supplement: 1993supmat_10-1055-a-1311-0561.pdf [file 1993supmat_10-1055-a-1311-0561.pdf]

## Supplementary material

### Appendix 1 (Survey Questions)

1. Please select your job role?

Gastroenterologist [ ]

Surgeon [ ]

Nurse endoscopist [ ]

Others (please specify) [ ]

2. Please select your age group?

20-30 [ ]

31-40 [ ]

41-50 [ ]

51-60 [ ]

>60 [ ]

3. Gender?

Female [ ]

Male [ ]

Other (please specify) [ ]

4. In which country are you based?

Please specify [ ]

5. How you would describe your hospital or health practice?

District hospital/community practice with less than 5 specialists performing endoscopy [ ]

District hospital/community practice with equal or more than 5 specialists performing endoscopy [ ]

Teaching hospital/academic practice (University-affiliated group with less than 5 specialists performing endoscopy) [ ]

Teaching hospital/academic practice (University-affiliated group with equal or more than 5 specialists performing [ ]

6. Do you perform colonoscopy independently?

Yes [ ]

No [ ]

7. Which type of video endoscopy system you usually use?

Olympus [ ]

Pentax [ ]

Fujifilm [ ]

Other (please specify) [ ]

8. Please document the approximate total number of colonoscopies you have performed throughout your career?

Please specify [ ]

9. How many colonoscopies do you perform per year on average?

0-50 [ ]

50-100 [ ]

## Supplementary material

- 100-150 [ ]
- 150-200 [ ]
- 200-300 [ ]
- 300-400 [ ]
- >400 [ ]
- Others (please specify) [ ]

10. How many hours/week usually spent performing colonoscopies?

- 0-5 [ ]
- 6-10 [ ]
- 11-15 [ ]
- 16-20 [ ]
- 21-25 [ ]
- 26-30 [ ]
- 30-40 [ ]
- >40 [ ]
- Other (please specify) [ ]

11. How many years have you have been performing colonoscopy?

- 0-5 [ ]
- 6-10 [ ]
- 11-15 [ ]
- 16-20 [ ]
- 21-25 [ ]
- 26-30 [ ]
- >30 [ ]

12. Have you ever experienced musculoskeletal injury (pain, numbness, deformity, tendon problems, etc) in your neck, back, or upper or lower limbs?

- Yes [ ]
- No [ ]
- Not applicable [ ]

13. Details about injury (click all that can apply)?

- Right fingers [ ]
- Right thumb [ ]
- Right hand [ ]
- Right wrist [ ]
- Right elbow [ ]
- Right shoulder [ ]
- Left fingers [ ]
- Left thumb [ ]
- Left hand [ ]
- Left wrist [ ]
- Left elbow [ ]
- Left shoulder [ ]
- Neck [ ]
- Upper back [ ]
- Lower back [ ]
- Hip [ ]

## Supplementary material

Right lower limb [ ]

Left lower limb [ ]

Not applicable [ ]

Other injuries/comments [free text)

14. Was the injury caused by performing colonoscopy?

Yes [ ]

No [ ]

May be [ ]

15. Did you ever take time off work due to definite or possible colonoscopy-related injury(ies)?

Yes [ ]

No [ ]

16. If Yes to above, what is the longest consecutive amount of time you have taken off work because of a musculoskeletal injury perceived to be related to colonoscopy?

Free text [ ]

17. What do you think is the causative mechanism for the presumed Colonoscopy-Related Injuries (click all that apply)?

Torquing the scope [ ]

Turning the control wheels [ ]

Lengthy standing [ ]

Awkward wrist, shoulder, and neck postures [ ]

Incorrect bed height [ ]

Stiff Colonoscope [ ]

Repetitive hand motion [ ]

Other (please specify) [ ]

18. Have you ever had to modify your practice due to occupational injury?

Yes [ ]

No [ ]

19. If you experienced musculoskeletal pain/injury related to colonoscopy, what modifications have you made to your endoscopic practice? (click all that apply)

None [ ]

Stretching exercises [ ]

Using adjustable examination table [ ]

Appropriate positioning of the video monitor [ ]

Wearing orthopedic shoes/sneakers [ ]

Reducing the total number of patients per session/list [ ]

Sitting during colonoscopy [ ]

Colonoscopy with assistant [ ]

Stand on rubber mat [ ]

Using towel for better grip of the scope [ ]

Taking regular breaks [ ]

Other (please specify) [ ]

## Supplementary material

20. What treatment(s) have you ever received for your injury(ies)? (click all that apply)

No treatment [  ]

Short course medications [  ]

Life-long medications [  ]

Physiotherapy [  ]

Steroid intra-articular injection [  ]

Rest [  ]

Splint [  ]

Surgery [  ]

Other (please specify) [  ]
